# Supplementary material for: Dynamic behavior analysis of ion transport through a bilayer lipid membrane by an electrochemical method combined with fluorometry
Source: Royal Society of Chemistry journal article supplement (doi:10.1039/d0an00222d), 2020-01-01
Supplement: d0an00222d1.pdf [file d0an00222d1.pdf]

## ELECTRONIC SUPPLEMENTARY INFORMATION

### Dynamic behavior analysis of ion transport through a bilayer lipid membrane by an electrochemical method combined with fluorometry

Terumasa Omatsu<sup>a</sup>, Kisho Hori<sup>a</sup>, Yasuhiro Naka<sup>a</sup>, Megumi Shimazaki<sup>a</sup>, Kazushige Sakai<sup>a</sup>, Koji Murakami<sup>a</sup>, Kohji Maeda<sup>a</sup>, Mao Fukuyama<sup>b,c</sup> and Yumi Yoshida<sup>\*a</sup>

*a. Faculty of Molecular Chemistry and Engineering, Kyoto Institute of Technology, Matsugasaki, Sakyo-ku, Kyoto 606-8585, Japan*

*b. PRESTO, Japan Science and Technology Agency, 4-1-8 Honcho, Kawaguchi, Saitama 332-0012, Japan*

*c. Institute of Multidisciplinary Research for Advanced Materials, Tohoku University, Katahira, Aoba-ku, Sendai 980-8577, Japan*

*\*Corresponding author: yyoshida@kit.jp*

#### Extraction procedure of rhodamine 6G, R6G<sup>+</sup>, and BF<sub>4</sub><sup>-</sup> with liposomes

The extraction of R6G<sup>+</sup> with BF<sub>4</sub><sup>-</sup> based on the dialysis membrane method<sup>1-3</sup> was carried out as described in previous work<sup>4</sup>. The aqueous solution was separated using a dialysis tube of regenerated cellulose (diameter of 16 mm, thickness of 20.3 μm, pore size of 5 nm, molecular weight cut-off of 14,000 Da; UC 20-32-100, Viskase Companies Inc., Illinois, USA). The dialysis tube including the aqueous inner solution (1 cm<sup>-3</sup>), whose top and bottom were tightly tied with Nylon line (Nasuly N-Walker Nylon W-DMV, YGK Yoz-Ami Co., Ltd., Naruto, Japan) to avoid inner solution leakage, was soaked in a test glass tube (height of 180 mm, internal diameter of 15 mm) filled with the outer solution (5 cm<sup>-3</sup>). The inner solution contained 0.10 M phosphate buffer (pH 7), various concentrations of

NaBF<sub>4</sub>, and  $1.0 \times 10^{-6}$  mol dm<sup>-3</sup> R6GCl; whereas the outer solution contained 0.10 mol dm<sup>-3</sup> phosphate buffer (pH 7), various concentrations of NaBF<sub>4</sub>, and liposomes consisting of  $3.3 \times 10^{-3}$  mol dm<sup>-3</sup> PC and  $3.3 \times 10^{-3}$  mol dm<sup>-3</sup> cholesterol. The liposomes were prepared as described in previous work<sup>4</sup>, the size of the liposomes was  $140 \pm 60$  nm. The ionic strength of the aqueous solution was mainly determined by 0.10 mol dm<sup>-3</sup> phosphate buffer, and all extraction experiments were carried out under the same ionic strength. The test glass tubes with the outer and inner solutions were shaken for 15 h at 20°C in a reciprocal shaker (Taiyo Incubator Personal, Taiyo Kagakukogyo Co., Tokyo, Japan). We confirmed that the extraction time of 15 h was enough to attain extraction equilibrium by measuring the R6G<sup>+</sup> concentrations in the inner and outer solutions, where their concentration after extraction indicates the same value. To avoid R6G<sup>+</sup> adsorption, the dialysis tube and the glass tube required pretreatment<sup>4</sup>.

For the extraction, two sets of test glass tubes were prepared for each experiment: one in the presence of liposomes (the measurement cell) and the other in their absence (the reference cell). The amount of extracted R6G<sup>+</sup> was estimated from the difference between the R6G<sup>+</sup> concentration in the inner solution of the measurement cell, [R6G<sup>+</sup>]<sub>mea</sub>, and that of the reference cell, [R6G<sup>+</sup>]<sub>ref</sub>. The concentration of R6G<sup>+</sup> in the solution was determined by fluorescence spectrometry (FP6200, Jasco Co., Tokyo, Japan).

### Determination of apparent distribution ratio

The apparent distribution ratio,  $R$ , of  $R6G^+$  between the aqueous phase, W, and the liposome membrane, lip, was defined as the ratio of the concentration of  $R6G^+$  in lip ( $[R6G^+]_{lip}^T$ ) to the concentration of  $R6G^+$  in W,  $[R6G^+]_W$ .

$$R = \frac{[R6G^+]_{lip}^T}{[R6G^+]_W} \quad (S1)$$

Here,  $[A]_B$  indicates molar concentration of A in phase B. We assumed the ion-pair formation in W to be negligible and the concentration of  $R6G^+$  in W to be equal to  $[R6G^+]_W$ , which was experimentally estimated as  $[R6G^+]_{mea}$ .  $[R6G^+]_{lip}^T$  was estimated as the apparent concentration of  $R6G^+$  in lip based on the decrease in  $R6G^+$  concentration of the inner solution caused by the addition of the liposome ( $[R6G^+]_{ref} - [R6G^+]_{mea}$ ).

$$[R6G^+]_{lip}^T = ([R6G^+]_{ref} - [R6G^+]_{mea}) \frac{(V_{out} + V_{in})}{V_{lip}} \quad (S2)$$

Here,  $V_{in}$  and  $V_{out}$  are the volumes of the inner ( $1 \text{ cm}^3$ ) and outer solutions ( $5 \text{ cm}^3$ ) in the dialysis tube, respectively.  $V_{lip}$  is the volume of the BLM phase of all liposomes, which was calculated from PC concentration  $[PC]$ , determined using an *in vitro* assay kit; the thickness of the BLM ( $x = 5 \text{ nm}$ ) and the molecular area of the PC ( $A = 0.456 \text{ nm}^2/\text{molecule}^{5,6}$ ) according to Eq. (S3).

$$V_{lip} = [PC]V_{out}N_AAx/2 \quad (S3)$$

where  $N_A$  is the Avogadro constant. In the calculation of  $R$ , the concentration of  $R6G^+$  in the internal aqueous phase of the liposome was assumed to be  $[R6G^+]_W$ . Even if the amount of  $R6G^+$  transferring

into the internal aqueous phase of the liposome was low, the effect on  $R$  was considered negligible because the volume of the internal aqueous phase was about 1% of the total volume of the outer and inner solutions.

The measured  $[R6G^+]_{\text{mea}}$  and  $[R6G^+]_{\text{ref}}$  are shown in Fig. S1.

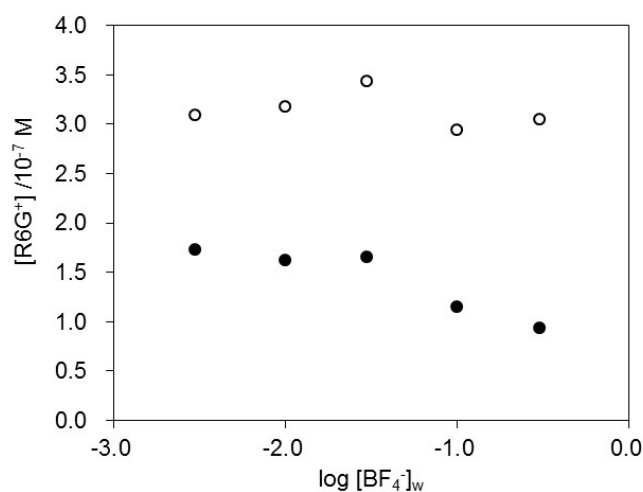

**Fig. S1** Dependence of  $[R6G^+]_{\text{ref}}$  and  $[R6G^+]_{\text{mea}}$  in the presence of PC (●,  $[R6G^+]_{\text{mea}}$ ) and in the absence of PC (○,  $[R6G^+]_{\text{ref}}$ ) upon the concentration of  $BF_4^-$ . Original composition of the aqueous solution:  $1.0 \times 10^{-1} \text{ mol dm}^{-3}$  phosphate buffer (pH 7.0),  $1.8 \times 10^{-7} \text{ mol dm}^{-3}$  R6GCl, and  $x \text{ mol dm}^{-3}$   $NaBF_4$  ( $x = 3.0 \times 10^{-3}, 1.0 \times 10^{-2}, 3.0 \times 10^{-2}, 1.0 \times 10^{-1}$  or  $3.0 \times 10^{-1}$ ). PC and cholesterol concentration add as liposome:  $3.3 \times 10^{-3} \text{ mol dm}^{-3}$ .

### Adsorption of $R6G^+$ on the liposome surface with the PC:CH ratio of 1:1

The total mole number per unit area of adsorption sites,  $N_{\text{ads}}^T$  on the liposome with the PC:CH ratio of 1:1 was evaluated by the liposome extraction described above, which is same procedure in

previous paper<sup>4</sup>. The liposome extraction was performed in changing the R6G<sup>+</sup> concentration in aqueous phase from  $2.5 \times 10^{-4} \text{ mol dm}^{-3}$  to  $1.0 \times 10^{-3} \text{ mol dm}^{-3}$ . The R6G<sup>+</sup> was added as a chloride salt. In this condition,  $R$  was independent upon concentration of Cl<sup>-</sup>; R6G<sup>+</sup> and Cl<sup>-</sup> are undistributed into the liposome membrane. It was assumed that the decrease in  $[\text{R6G}^+]_W$  was caused by the adsorption of R6G<sup>+</sup> on the liposome surface. The mole number of R6G<sup>+</sup> adsorbed on the liposome surface,  $N_{\text{R6G}^+, \text{ads}}$ , was plotted to  $[\text{R6G}^+]_W$  (Fig. S2).  $N_{\text{R6G}^+, \text{ads}}$  increased with the increase of  $[\text{R6G}^+]_W$  and reached the saturated adsorption at  $1.0 \times 10^{-3} \text{ mol m}^{-2}$ . Therefore,  $N_{\text{ads}}^T$  was assumed to be  $0.85 \times 10^{-7} \text{ mol m}^{-2}$ .

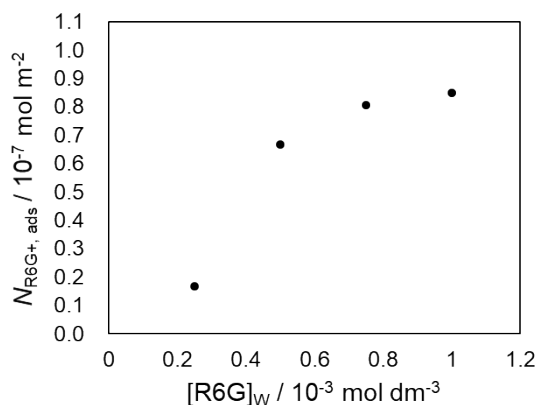

**Figure S2.** (a) Equilibrium isotherm for the adsorption of R6G<sup>+</sup> on the surface of a liposome. Original composition of the aqueous solution:  $x \text{ mol dm}^{-3}$  R6G<sup>+</sup> ( $2.5 \times 10^{-4}$ ,  $5.0 \times 10^{-4}$ ,  $7.5 \times 10^{-4}$  or  $1 \times 10^{-3}$ ),  $1.0 \times 10^{-1} \text{ mol dm}^{-3}$  phosphate buffer (pH 7) and  $1.0 \times 10^{-3} \text{ mol dm}^{-3}$  NaCl. PC and cholesterol concentration add as liposome:  $3.3 \times 10^{-3} \text{ mol dm}^{-3}$ .

#### Evaluation of $K_D$ , $K_{ip}$ and $K_{\text{ads}}$ by analysing $R$

The  $R$  values were calculated from the experimental results of Fig. S1 according to Eqs. (S1–S3).  $R$  is expressed by Eq. (S4)<sup>4</sup>.

$$R = K_{ip}K_D[BF_4^-]_W + \frac{K_D}{\sqrt{[R6G^+]_W}}\sqrt{[BF_4^-]_W} + \frac{2N_{ads}^T K_{ad}}{x(1 + K_{ad}[R6G^+]_W)} \quad (S4)$$

The obtained  $R$  was plotted against  $([BF_4^-]_W)^{1/2}$ , as shown in Fig. S3 and analyzed using Eq. (S4) by quadratic curve approximation.

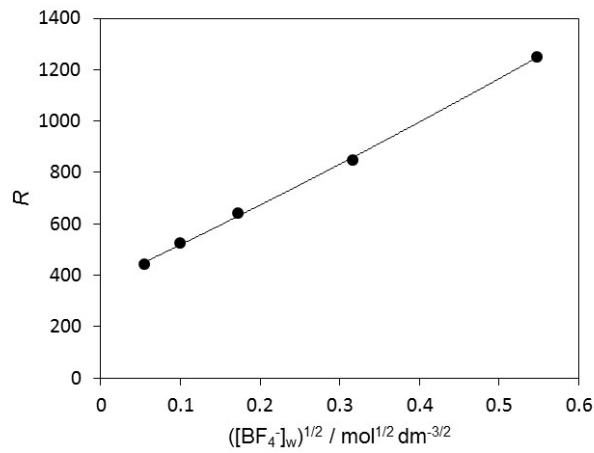

**Fig. S3** Dependence of  $R$  estimated from  $([R6G^+]_{\text{ref}} - [R6G^+]_{\text{mea}})$  in Fig. S1 upon the concentration of the  $BF_4^-$ . The solid line indicates an approximate curve analyzed according to Eq. (S4).

## Reference

- 1 B. I. Escher and R. P. Schwarzenbach, *Environ. Sci. Technol.*, 1996, **30**, 260–270.
- 2 B. I. Escher, R. P. Schwarzenbach and J. C. Westall, *Environ. Sci. Technol.*, 2000, **34**, 3954–3961.
- 3 B. I. Escher, R. P. Schwarzenbach and J. C. Westall, *Environ. Sci. Technol.*, 2000, **34**, 3962–3968.
- 4 K. Murakami, K. Hori, K. Maeda, M. Fukuyama and Y. Yoshida, *Langmuir*, 2016, **32**, 10678–10684.
- 5 T. X. Xiang and B. D. Anderson, *Biophys. J.*, 1997, **72**, 223–237.
- 6 J. M. Nitsche and G. B. Kasting, *J. Pharm. Sci.*, 2013, **102**, 2005–2032.
